# Supplementary material for: Growing Resilience through Interaction with Nature: Can Group Walks in Nature Buffer the Effects of Stressful Life Events on Mental Health?
Source: Int J Environ Res Public Health. 2019 Mar 19;16(6):986. doi: 10.3390/ijerph16060986 (PMC6466337; doi:10.3390/ijerph16060986)
Supplement: Supplementary file 1 [file ijerph-16-00986-s001.pdf]

# Supplementary Files

## Growing Resilience through Interaction with Nature: Can Group Walks in Nature Buffer the Effects of Stressful Life Events on Mental Health?

Melissa R. Marselle <sup>1,2,\*</sup>, Sara L. Warber <sup>3,4</sup> and Katherine N. Irvine <sup>5</sup>

<sup>1</sup> Department of Ecosystem Services, Helmholtz Centre for Environmental Research –UFZ, , Permoserstr. 15, 04318 Leipzig, Germany

<sup>2</sup> German Centre for Integrative Biodiversity Research (iDiv) Halle-Jena-Leipzig, Deutscher Platz 5e, 04103 Leipzig, Germany

<sup>3</sup> Department of Family Medicine, University of Michigan, Ann Arbor, MI, 48104, USA; swarber@med.umich.edu

<sup>4</sup> European Centre for Environment and Human Health, University of Exeter School of Medicine, Truro, TR1 3HD, UK

<sup>5</sup> Social, Economic and Geographical Sciences, The James Hutton Institute, Craigiebuckler, Aberdeen, Scotland, AB15 8QH, UK; Katherine.Irvine@hutton.ac.uk

\* Correspondence: melissa.marselle@ufz.de; Tel.: +49-341-9733151

**Table S1.** Characteristics of the matched<sup>a</sup> Nature Group Walkers (main sample) on demographics, health, and past stressful life events.

| Demographics, health status, and past stressful life events and physical activity | Nature group walkers<br>( <i>n</i> = 1081) | Comparison Group<br>( <i>n</i> = 435) | Statistic            | <i>p</i> -value |
|-----------------------------------------------------------------------------------|--------------------------------------------|---------------------------------------|----------------------|-----------------|
| Gender (female %)                                                                 | 65.5%                                      | 68.1%                                 | $\chi^2 (1) = 0.952$ | 0.329           |
| Age (55+ %)                                                                       | 88.3%                                      | 88.4%                                 | $\chi^2 (1) = 0.000$ | 0.995           |
| Marital status (in a relationship %)                                              | 71.3%                                      | 70.4%                                 | $\chi^2 (1) = 0.122$ | 0.727           |
| Qualification (tertiary education %)                                              | 52.2%                                      | 54.9%                                 | $\chi^2 (2) = 3.560$ | 0.169           |
| Ethnicity (white %)                                                               | 96.7%                                      | 97.2%                                 | $\chi^2 (1) = .314$  | 0.575           |
| Deprivation (least deprived %)                                                    | 50.9%                                      | 51.5%                                 | $\chi^2 (2) = .224$  | 0.894           |
| Health condition (with condition) %                                               | 16.2%                                      | 20.5%                                 | $\chi^2 (1) = 4.039$ | 0.044           |
| Medical condition (with condition) %                                              | 34.8%                                      | 38.5%                                 | $\chi^2 (1) = 1.904$ | 0.168           |
| Disability (with disability) %                                                    | 8.9%                                       | 6.7%                                  | $\chi^2 (1) = 2.033$ | 0.154           |
| GP recommend WfH (yes) %                                                          | 6.2%                                       | 7.9%                                  | $\chi^2 (1) = 1.369$ | 0.242           |
| Past stressful life events <sup>b</sup> (none) %                                  | 32.9%                                      | 32.5%                                 | $\chi^2 (2) = 0.061$ | 0.970           |
| Past Physical activity <sup>c</sup> <i>M</i> (SD)                                 | 3.50 (1.94)                                | 3.32 (2.13)                           | $t(740.02) = 1.502$  | 0.134           |

*Note.* Data reproduced from Marselle et al. (2014). <sup>a</sup>Propensity matched sample; all analyses weighted by propensity score weight. <sup>b</sup>Stressful life events experienced in the past year. <sup>c</sup> Number of days in the week prior to first WfH group walk took part in 30 minutes or more of physical activity.

**Table S2.** Characteristics of the matched <sup>a</sup> Frequent Nature Group Walkers <sup>b</sup> (subsample) on demographics, health status, past stressful life events and past physical activity.

| Demographics, health status, and past stressful life events and physical activity | Frequent green group walkers (n = 631) | Comparison Group (n = 306) | Statistic                  | p-value |
|-----------------------------------------------------------------------------------|----------------------------------------|----------------------------|----------------------------|---------|
| Gender (female %)                                                                 | 62.8%                                  | 61%                        | X <sup>2</sup> (1) = 0.266 | 0.606   |
| Age (55+ %)                                                                       | 92.7%                                  | 92.7%                      | X <sup>2</sup> (1) = 0.000 | 1.00    |
| Marital status (in a relationship %)                                              | 71.6%                                  | 71.6%                      | X <sup>2</sup> (1) = 0.000 | 1.00    |
| Qualification (tertiary education %)                                              | 46%                                    | 46%                        | X <sup>2</sup> (2) = 0.968 | 0.616   |
| Ethnicity (white %)                                                               | 96.5%                                  | 96.2%                      | X <sup>2</sup> (1) = 0.058 | 0.810   |
| Deprivation (least deprived %)                                                    | 49.4%                                  | 49.1%                      | X <sup>2</sup> (2) = 0.178 | 0.915   |
| Health condition (with condition) %                                               | 17.6%                                  | 18.4%                      | X <sup>2</sup> (1) = 0.088 | 0.766   |
| Medical condition (with condition) %                                              | 36.6%                                  | 38.5%                      | X <sup>2</sup> (1) = 0.319 | 0.572   |
| Disability (with disability) %                                                    | 9%                                     | 9%                         | X <sup>2</sup> (1) = 0.000 | 1.00    |
| GP recommend WfH (yes) %                                                          | 7%                                     | 9.2%                       | X <sup>2</sup> (1) = 1.428 | 0.232   |
| Past stressful life events <sup>c</sup> (none) %                                  | 33.3%                                  | 34.7%                      | X <sup>2</sup> (2) = 2.552 | 0.279   |
| Past Physical activity <sup>d</sup> M (SD)                                        | 3.54 (1.89)                            | 3.49 (1.96)                | t(935) = -0.357            | 0.721   |

*Note.* <sup>a</sup>Propensity matched sample; all analyses weighted by propensity score weight. <sup>b</sup>The Frequent Nature Group Walkers subsample consists of participants from the main sample who attended a group walk in the natural environment at least once per week in the previous three months. <sup>c</sup>Stressful life events experienced in the past year. <sup>d</sup>Number of days in the week prior to first WfH group walk took part in 30 minutes or more of physical activity.

**Table S3.** Comparison of mean scores of social support, connectedness to nature and resiliency for matched <sup>a</sup> Nature Group Walkers and Comparison Group (main sample) and matched <sup>a</sup> Frequent Nature Group Walkers <sup>b</sup> and Comparison group (subsample).

| Outcomes <sup>c</sup>                                        | Nature Group Walkers<br>(M (SD)) | Comparison Group<br>(M (SD)) | <i>t</i> -test <sup>d</sup> | <i>p</i> -value |
|--------------------------------------------------------------|----------------------------------|------------------------------|-----------------------------|-----------------|
| <b>Nature Group Walkers (Main sample)<sup>1</sup></b>        |                                  |                              |                             |                 |
| Recent physical activity <sup>e</sup>                        | 3.46 (1.79)                      | 2.94 (2.11)                  | <i>t</i> (689.96) = -4.50   | < 0.001         |
| Social support                                               | 22.94 (6.44)                     | 22.82 (6.47)                 | <i>t</i> (1514) = -0.33     | 0.74            |
| Connectedness to nature <sup>e</sup>                         | 51.75 (7.67)                     | 50.79 (8.51)                 | <i>t</i> (732.47) = -2.05   | 0.04            |
| Resiliency <sup>e</sup>                                      | 28.60 (6.05)                     | 27.85 (6.96)                 | <i>t</i> (711.87) = -1.97   | 0.05            |
| <b>Frequent Nature Group Walkers (Subsample)<sup>2</sup></b> |                                  |                              |                             |                 |
| Recent physical activity <sup>e</sup>                        | 3.65 (1.76)                      | 3.03 (2.06)                  | <i>t</i> (523.88) = -4.52   | < 0.001         |
| Social support                                               | 22.83 (6.57)                     | 22.36 (6.50)                 | <i>t</i> (935) = -1.02      | 0.31            |
| Connectedness to nature <sup>e</sup>                         | 51.51 (7.62)                     | 51.24 (8.29)                 | <i>t</i> (560.75) = -0.49   | 0.63            |
| Resiliency <sup>e</sup>                                      | 28.68 (6.06)                     | 27.73 (6.93)                 | <i>t</i> (537.24) = -2.05   | 0.04            |

*Note.* <sup>a</sup>Propensity score matched sample; analysis weighted by propensity score weight. <sup>b</sup> The Frequent Nature Group Walkers subsample consists of participants from the main sample who attended a group walk in the natural environment at least once per week in the previous three months. <sup>c</sup> Higher scores indicate greater: social support (range 0-30), connection to nature (range 14-70), and resiliency (range 0-40). <sup>d</sup> Independent samples *t*-test. <sup>e</sup> Equal variances not assumed. <sup>1</sup> Nature Group Walkers *n* = 1081; Comparison Group *n* = 435. <sup>2</sup> Frequent Nature Group Walkers *n* = 631; Comparison Group *n* = 306.

**Table S4.** Number of recent stressful life events experienced by Nature Group Walkers or Propensity-matched Comparison group (main sample).

| <b>Stressful life events</b> | <b>Comparison group<br/>(<i>n</i> = 435)</b> | <b>Nature Group Walkers<br/>(<i>n</i> = 1081)</b> |
|------------------------------|----------------------------------------------|---------------------------------------------------|
| No life event                | 56.9% ( <i>n</i> = 248)                      | 58.1% ( <i>n</i> = 628)                           |
| 1 or more life event         | 43.1% ( <i>n</i> = 187)                      | 41.9% ( <i>n</i> = 453)                           |
| <i>M</i> (SD)                | 0.43 (0.50)                                  | 0.42 (0.49)                                       |

*Note.* Propensity score matched sample; analysis weighted by propensity score weight. There was a no significant difference between number of stressful life events experienced and group membership,  $t(1514) = 0.414$ ,  $p = 0.68$ .

**Table S5.** Number of recent stressful life events experienced by Frequent Nature Group Walkers or Propensity-matched Comparison group (subsample).

| <b>Stressful life events</b> | <b>Comparison group<br/>(<i>n</i> = 306)</b> | <b>Frequent Nature Group Walkers<br/>(<i>n</i> = 631)</b> |
|------------------------------|----------------------------------------------|-----------------------------------------------------------|
| No life event                | 51.8% ( <i>n</i> = 159)                      | 58.8% ( <i>n</i> = 371)                                   |
| 1 or more life event         | 48.2% ( <i>n</i> = 147)                      | 41.2% ( <i>n</i> = 260)                                   |
| <i>M</i> ( <i>SD</i> )       | 0.48 (0.50)                                  | 0.41 (0.49)                                               |

*Note.* Propensity score matched sample; analysis weighted by propensity score weight. There was a marginally significant difference between number of stressful life events experienced and group membership,  $t(595.27) = 2.010$ ,  $p = 0.05$ .
